# Supplementary material for: Association between the chronology of gestation and the morphometrical skin characteristics at childbirth: a development of predictive model
Source: HighWire-hosted journal article supplement (doi:10.1136/bmjhci-2021-100476), 2021-12-01
Supplement: bmjhci-2021-100476supp001_data_supplement.pdf [file bmjhci-2021-100476supp001_data_supplement.pdf]

## Supporting information

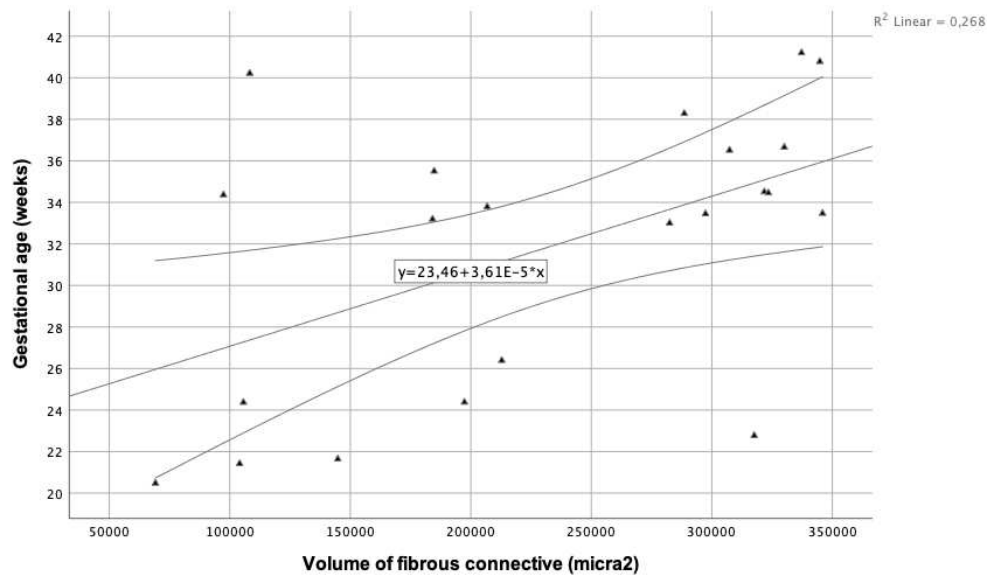

**S1 Fig. Univariate analysis of linear correlation between gestational age at birth and the thickness of the epidermal layer over the hand. S1 Fig legend  $R^2$ : regression determination coefficient.**

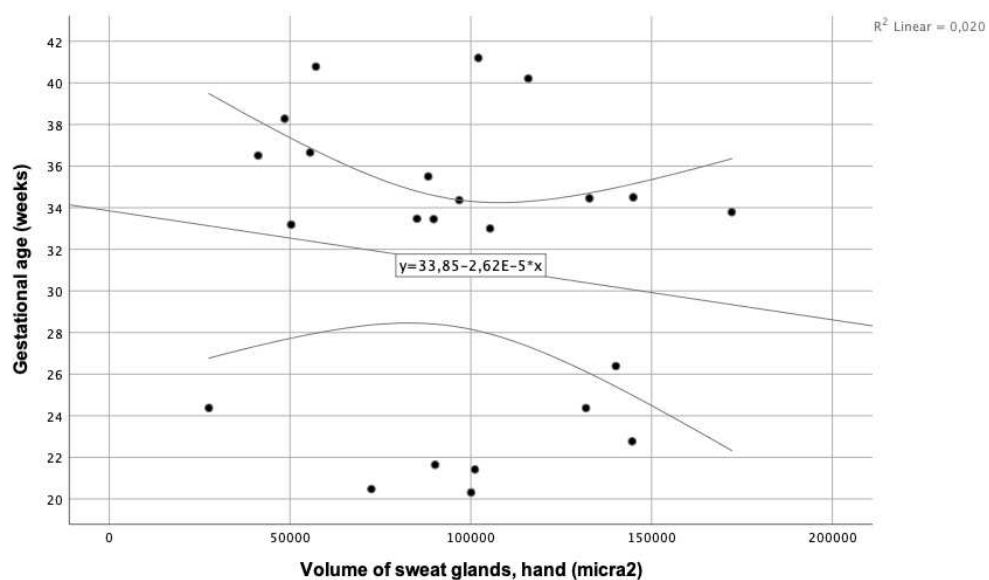

**S2 Fig. Univariate analysis of linear correlation between gestational age at birth and the thickness of the dermal layer over the hand. S1 Fig legend  $R^2$ : regression determination coefficient.**

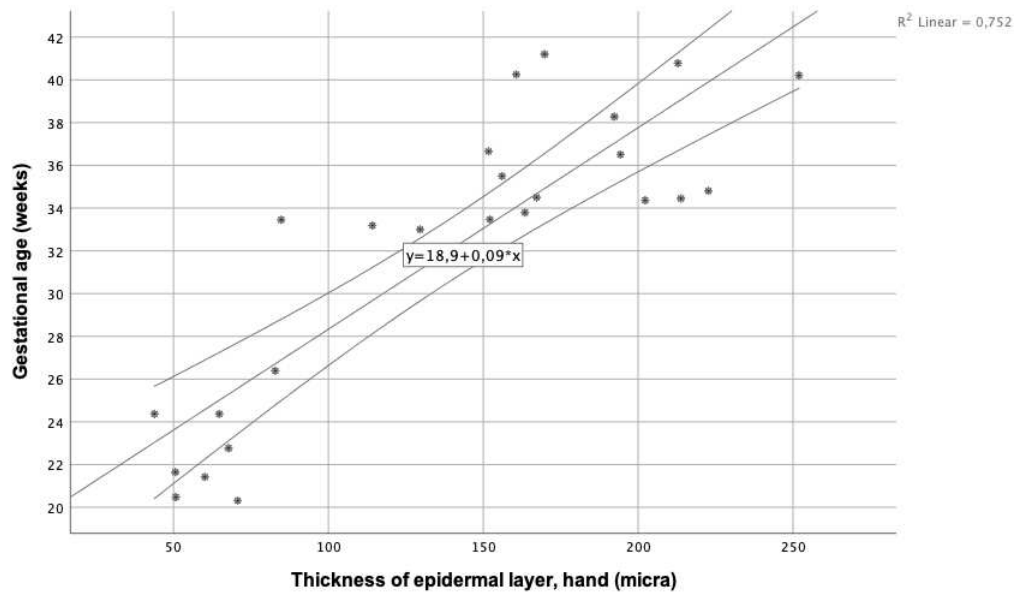

**S3 Fig. Univariate analysis of linear correlation between gestational age at birth and the area of the fibrous connective tissue over the hand. S1 Fig legend R<sup>2</sup>: regression determination coefficient.**

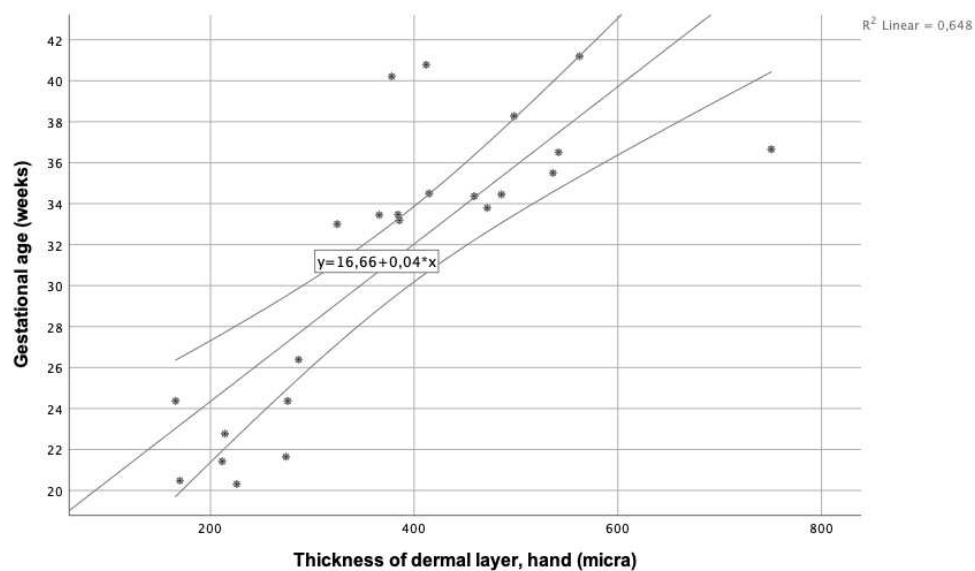

**S4 Fig. Univariate analysis of linear correlation between gestational age at birth and the area of sweat glands over the hand. S1 Fig legend R<sup>2</sup>: regression determination coefficient.**

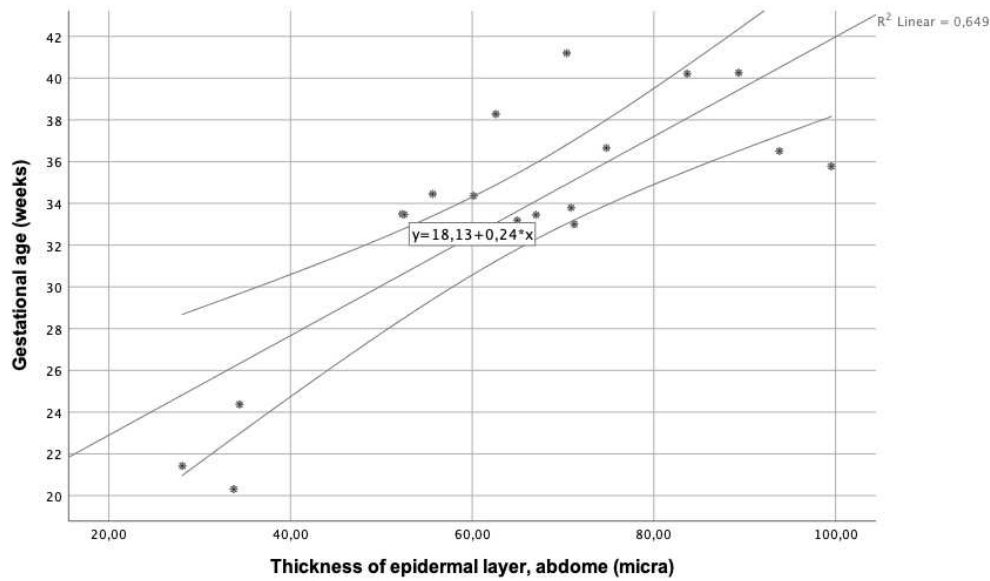

**S5 Fig. Univariate analysis of linear correlation between gestational age at birth and the thickness of the epidermal layer over the abdomen. S1 Fig legend  $R^2$ : regression determination coefficient.**

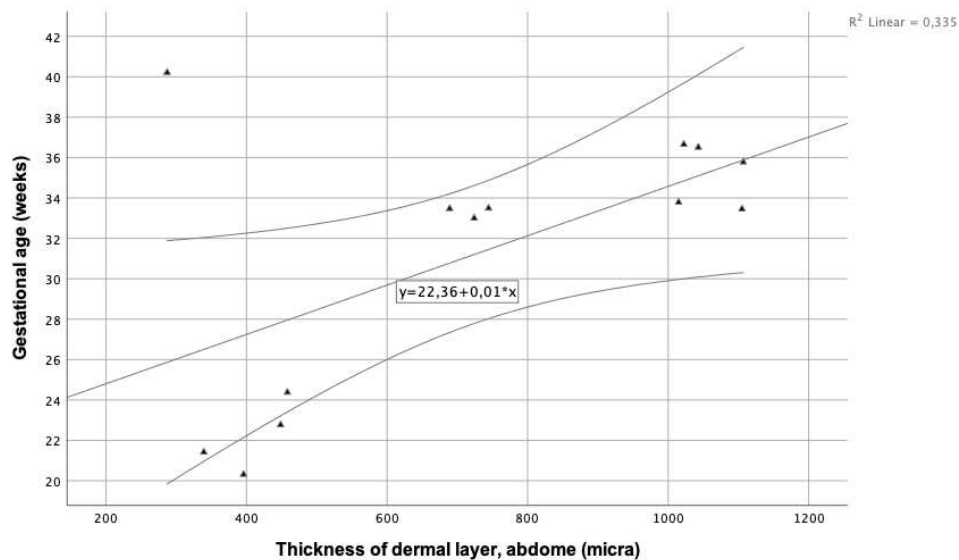

**S6 Fig. Univariate analysis of linear correlation between gestational age at birth and the thickness of the dermal layer over the abdomen. S1 Fig legend  $R^2$ : regression determination coefficient.**

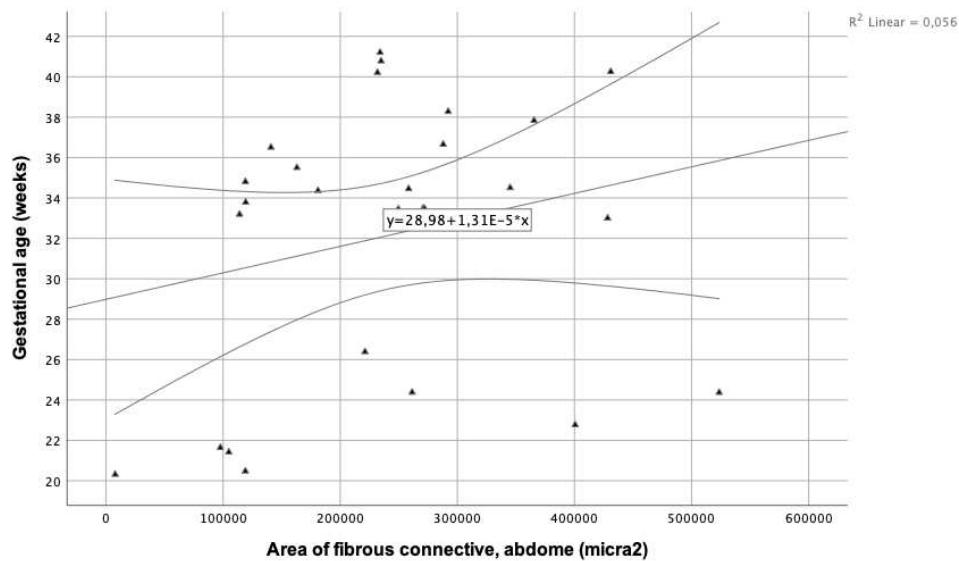

**S7 Fig. Univariate analysis of linear correlation between gestational age at birth and the area of the fibrous connective tissue over the abdomen. S1 Fig legend R<sup>2</sup>: regression determination coefficient.**

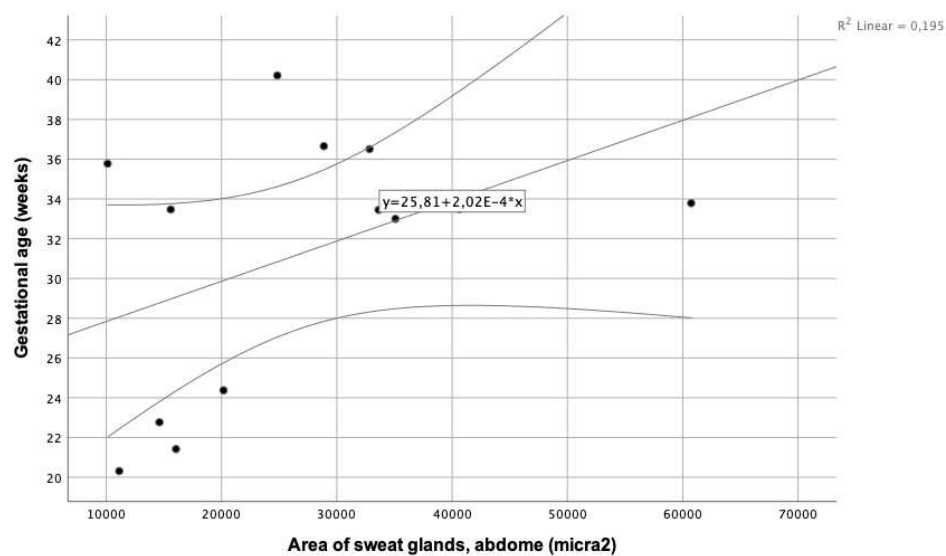

**S8 Fig. Univariate analysis of linear correlation between gestational age at birth and the area of sweat glands over the abdomen. S1 Fig legend R<sup>2</sup>: regression determination coefficient.**

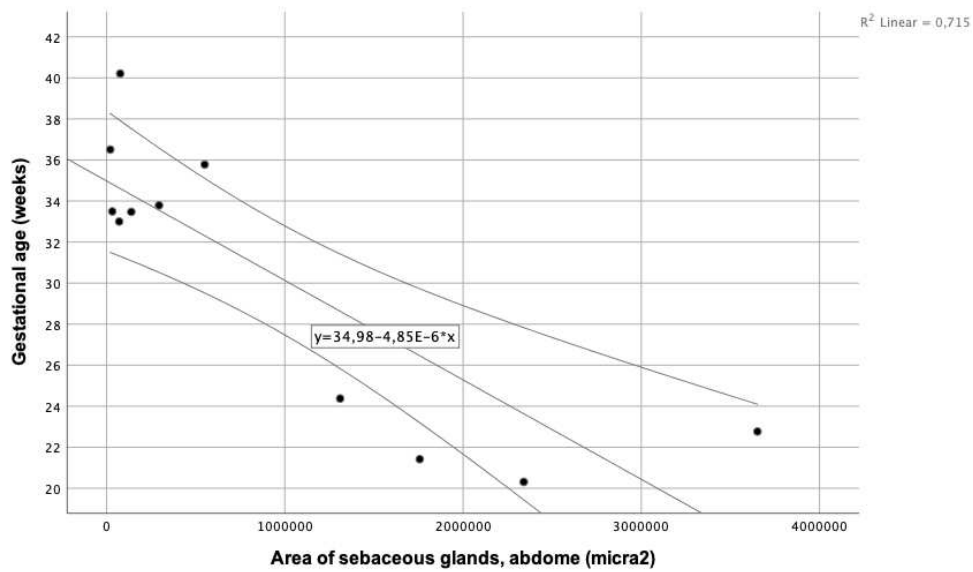

**S9 Fig. Univariate analysis of linear correlation between gestational age at birth and the area of sebaceous glands over the abdomen.** S1 Fig legend R<sup>2</sup>: regression determination coefficient

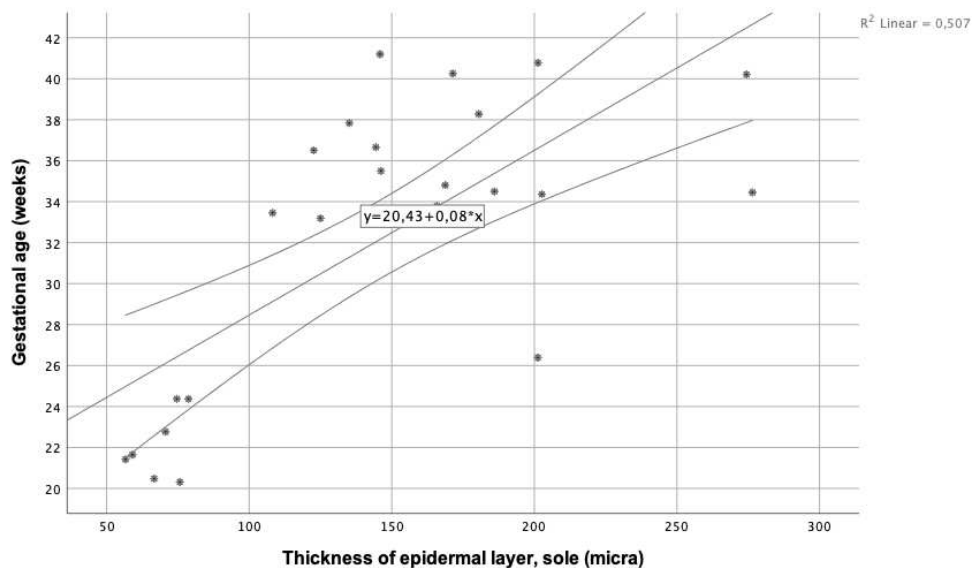

**S10 Fig. Univariate analysis of linear correlation between gestational age at birth and the thickness of the epidermal layer over sole.** S1 Fig legend R<sup>2</sup>: regression determination coefficient.

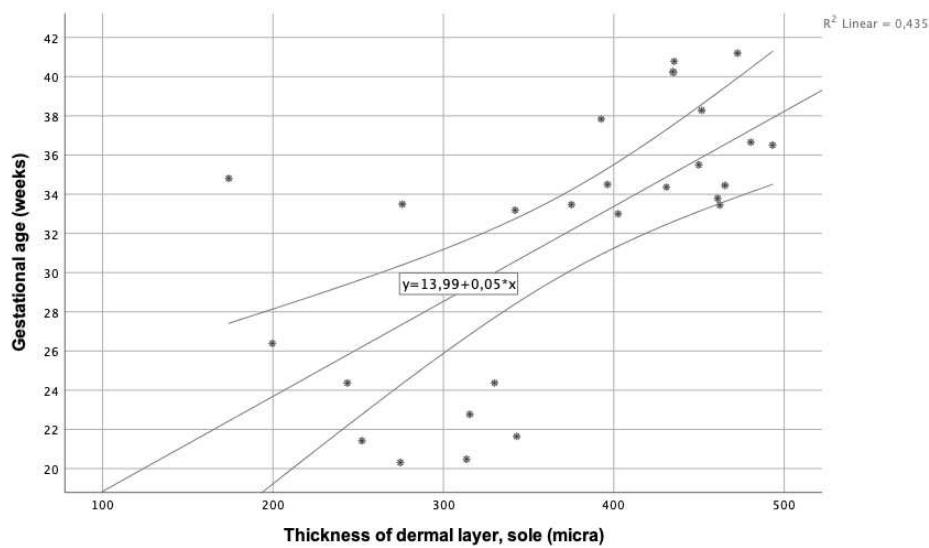

**S11 Fig. Univariate analysis of linear correlation between gestational age at birth and the thickness of the dermal layer over sole. S1 Fig legend  $R^2$ : regression determination coefficient.**

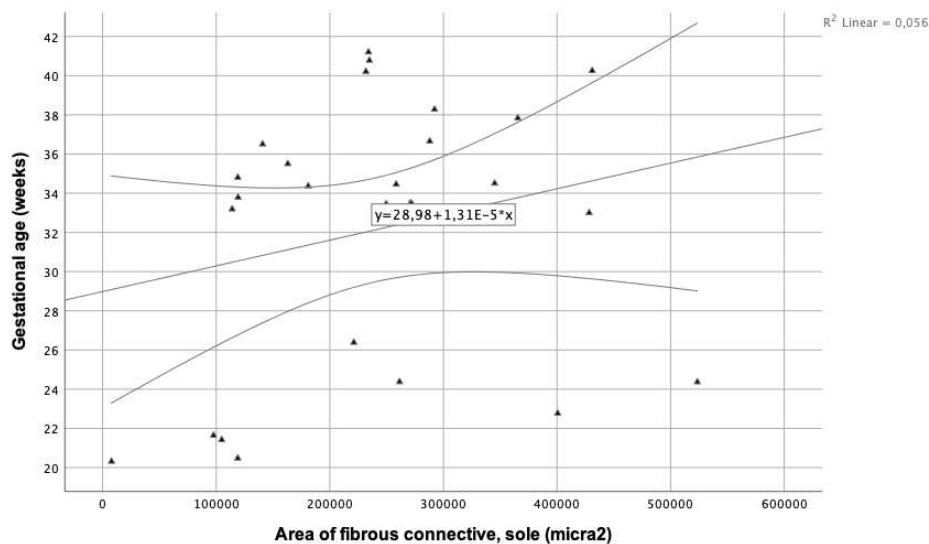

**S12 Fig. Univariate analysis of linear correlation between gestational age at birth and the area of fibrous connective tissue over sole. S1 Fig legend  $R^2$ : regression determination coefficient.**

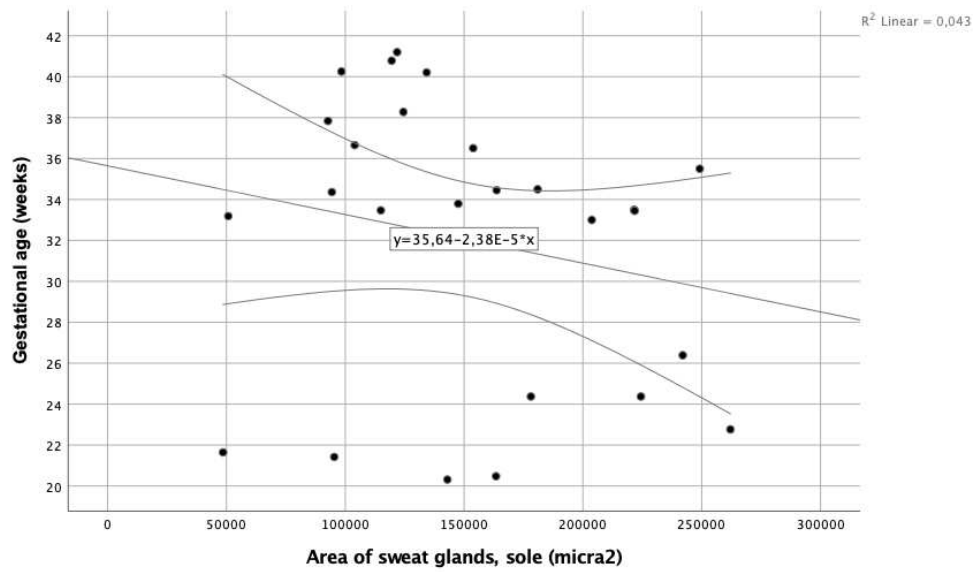

**S13 Fig. Univariate analysis of linear correlation between gestational age at birth and the area of sweat glands over sole. S1 Fig legend  $R^2$ : regression determination coefficient.**
